# Supplementary material
Source: publisher site journal article supplement (https://www.degruyterbrill.com/publication/isbn/9783110278439/downloadAsset/9783110278439_Inhaltsverzeichnis.pdf)
Supplement: Supplementary file 1 [file 9783110278439_Inhaltsverzeichnis.pdf]

# Inhalt

|                                                                                    |     |
|------------------------------------------------------------------------------------|-----|
| Vorwort .....                                                                      | V   |
| <i>Barbara Schlücker</i>                                                           |     |
| Die deutsche Kompositionsfreudigkeit. Übersicht und Einführung .....               | 1   |
| <i>Martin Neef &amp; Susanne R. Borgwaldt</i>                                      |     |
| Fugenelemente in neugebildeten Nominalkomposita .....                              | 27  |
| <i>Carmen Scherer</i>                                                              |     |
| Vom <i>Reisezentrum</i> zum <i>Reise Zentrum</i>                                   |     |
| Variation in der Schreibung von N+N-Komposita .....                                | 57  |
| <i>Bettina Morvinek</i>                                                            |     |
| Getrennt- und Zusammenschreibung:                                                  |     |
| Wie aus syntaktischen Strukturen komplexe Verben wurden .....                      | 83  |
| <i>Gisela Zifonun</i>                                                              |     |
| Komposition (oder Halbaffigierung) zum Ausdruck von                                |     |
| Nominalaspekt: <i>Schmuckstück</i> , <i>Glücksfall</i> und <i>Zuckerwerk</i> ..... | 101 |
| <i>Susan Olsen</i>                                                                 |     |
| Der Einfluss des Mentalen Lexikons auf die Interpretation von                      |     |
| Komposita .....                                                                    | 135 |
| <i>Björn Rothstein</i>                                                             |     |
| Zur temporalen Interpretation von nominal basierten Bildungen                      |     |
| auf <i>Alt-</i> .....                                                              | 171 |
| <i>Livio Gaeta &amp; Amir Zeldes</i>                                               |     |
| Deutsche Komposita zwischen Syntax und Morphologie:                                |     |
| Ein korpusbasierter Ansatz .....                                                   | 197 |
| <i>Wolfgang U. Dressler &amp; Karlheinz Mörb</i>                                   |     |
| Produktive und weniger produktive Komposition in ihrer Rolle                       |     |
| im Text an Hand der Beziehungen zwischen Titel und Text .....                      | 219 |
